# Supplementary material for: Dichlorosilane-derived nano-silicon inside hollow carbon spheres as a high-performance anode for Li-ion batteries
Source: Royal Society of Chemistry journal article supplement (doi:10.1039/c7ta00188f), 2017-01-01
Supplement: c7ta00188f1.pdf [file c7ta00188f1.pdf]

## Support Information

# **Dichlorosilane-Derived Nano-Silicon inside Hollow Carbon Spheres as High-Performance Anode in Li- Ion Batteries**

Tony Jaumann<sup>a</sup>, Maik Gerwig<sup>b</sup>, Juan Balach<sup>c</sup>, Steffen Oswald<sup>a</sup>, Erica Brendler<sup>b</sup>, Ralf Hauser<sup>d</sup>,  
Berndt Kieback<sup>d</sup>, Jürgen Eckert<sup>e</sup>, Lars Giebeler<sup>a,\*</sup>, Edwin Kroke<sup>b</sup>

<sup>a</sup>Leibniz Institute for Solid State and Materials Research (IFW) Dresden e.V.

Institute for Complex Materials, Helmholtzstraße 20, D-01069 Dresden, Germany

<sup>b</sup>Technische Universität Bergakademie Freiberg, Institut für Anorganische Chemie,

Leipziger Straße 29, D-09596 Freiberg, Germany

<sup>c</sup>Department of Chemistry, Universidad Nacional de Río Cuarto-CONICET, Route 36 Km  
601, X5804ZAB Río Cuarto, Argentina.

<sup>d</sup>Fraunhofer Institute for Manufacturing Technology and Advanced Materials IFAM, Branch  
Lab Dresden, Winterbergstraße 28, D-01277 Dresden, Germany

<sup>e</sup>Austrian Academy of Sciences, Erich Schmid Institute of Materials Science, Jahnstraße 12,  
A-8700 Leoben, Austria

Montanuniversität Leoben, Department Materials Physics, Jahnstraße 12, A-8700 Leoben,  
Austria

\*corresponding author: [l.giebeler@ifw-dresden.de](mailto:l.giebeler@ifw-dresden.de), phone: +49 351 4659 652

fax: +49 351 4659 452

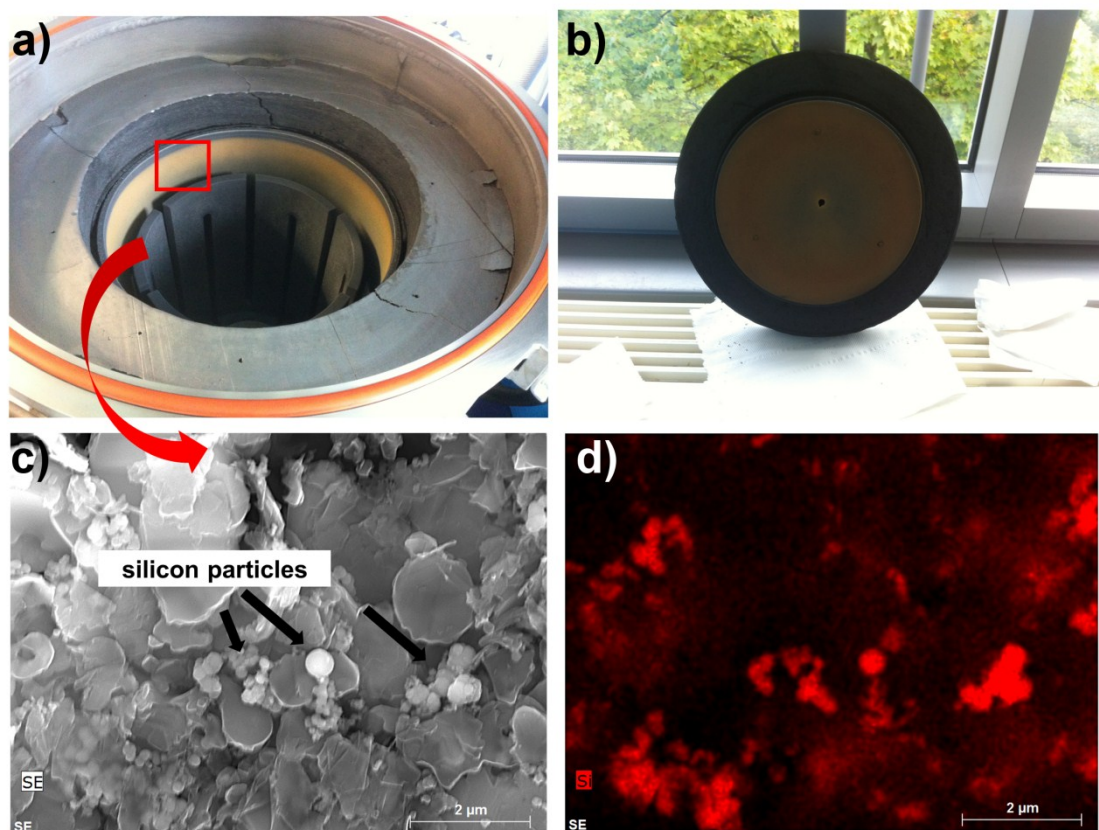

**Figure S1.** Photographs of (a) the reactor wall and (b) the cap of the oven after annealing of the HDCS (1 g) at 1150 °C. c) SE image of the brownish deposit showing silicon nanoparticles and the corresponding EDX map (d) of silicon.

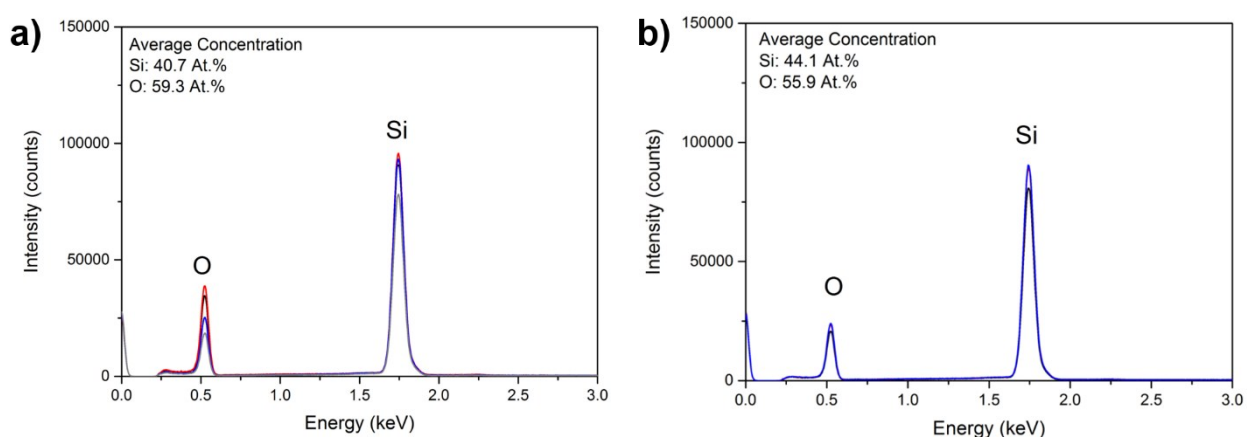

**Figure S2.** EDX spectra of several different positions of a) the annealed HTCS and b) the annealed HDCS.

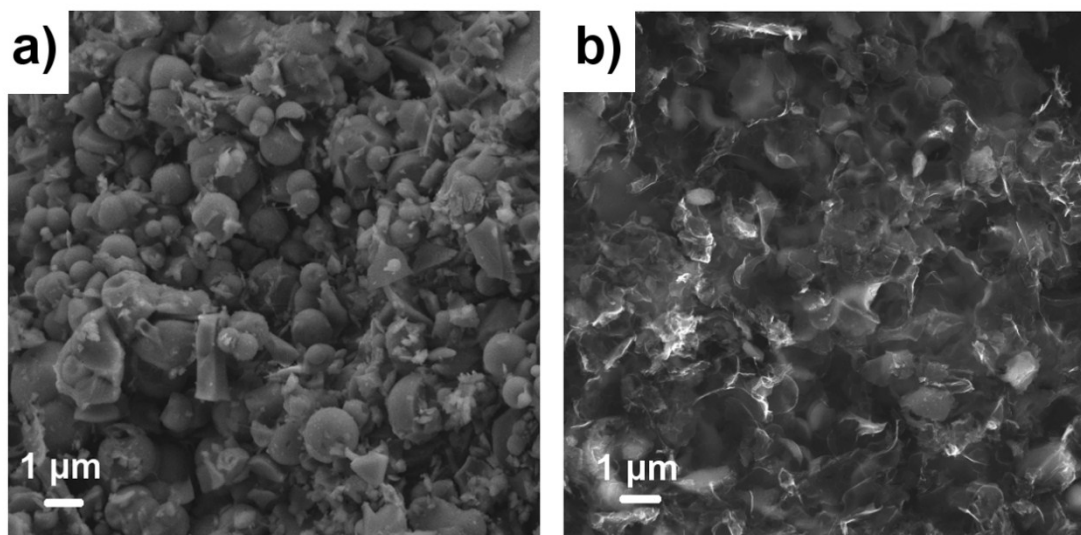

*Figure S3. a) SEM analysis of the annealed HDCS and b) of nc-Si@HCS.*

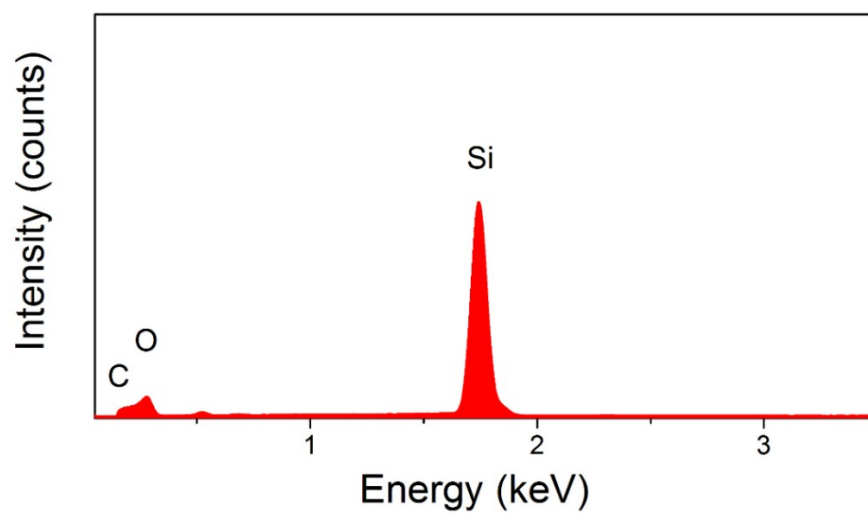

*Figure S4. EDX spectrum of the as-prepared nc-Si@HCS derived from HDCS*

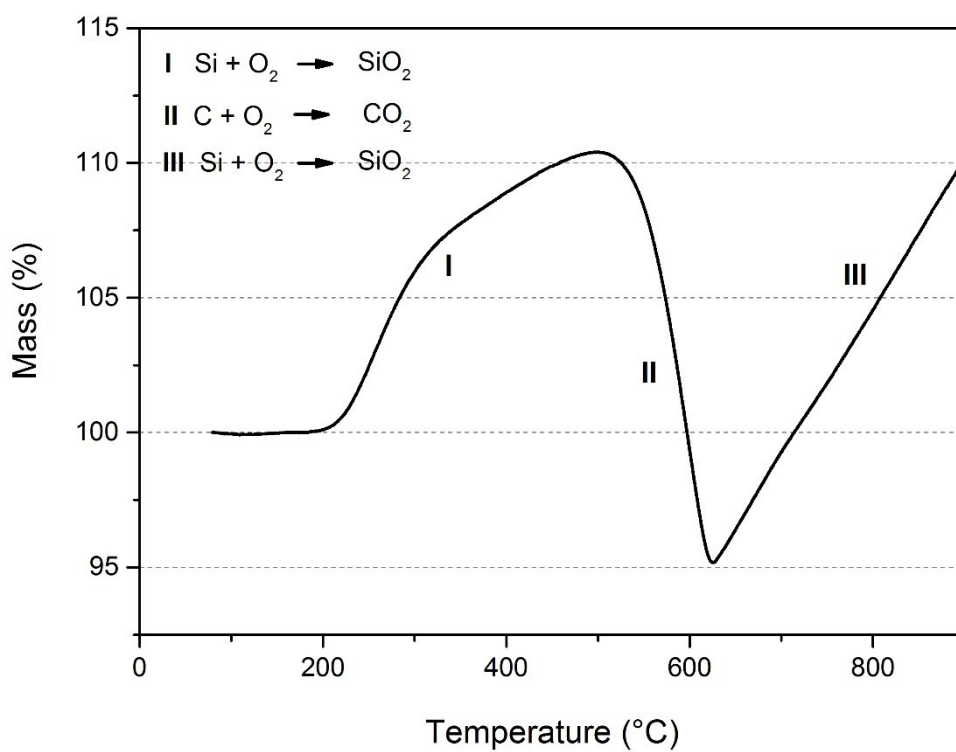

**Figure S5.** Thermogravimetric combustion of the nc-Si@HCS in synthetic air (10 K/min) with proposed reaction scheme over temperature increase.

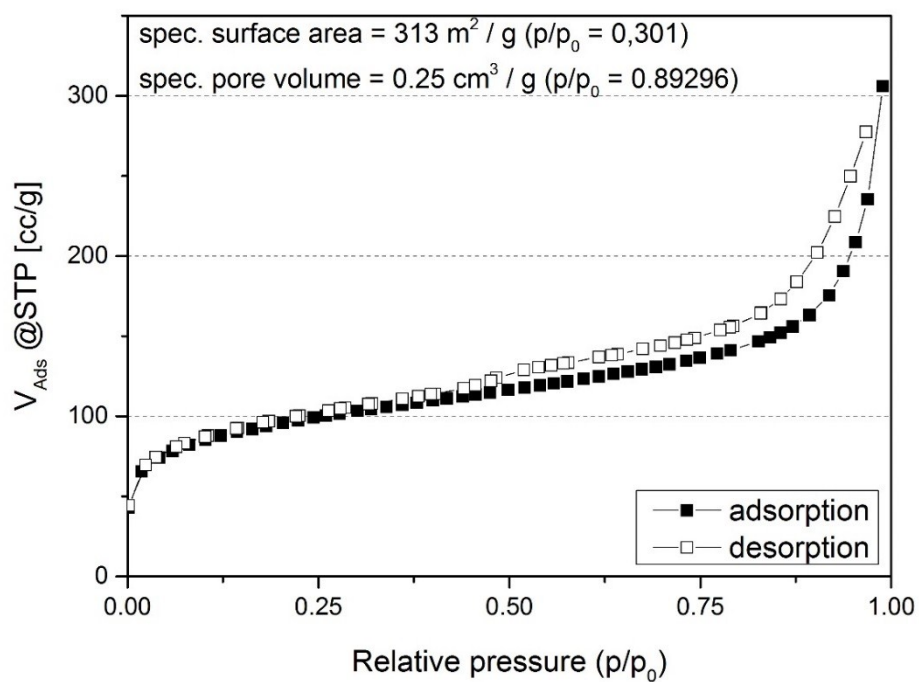

**Figure S6.** Nitrogen physisorption isotherms of the nc-Si@HCS with calculated BET surface area and pore volume.
